# Supplementary material for: Molecular hybridization of syringaldehyde and fibrate pharmacophores yields a novel derivative with potent, multi-target lipid-lowering activity
Source: Royal Society of Chemistry journal article supplement (doi:10.1039/d5md00765h), 2025-12-01
Supplement: d5md00765h1.pdf [file d5md00765h1.pdf]

### Spectrum of target compounds T1-T7.

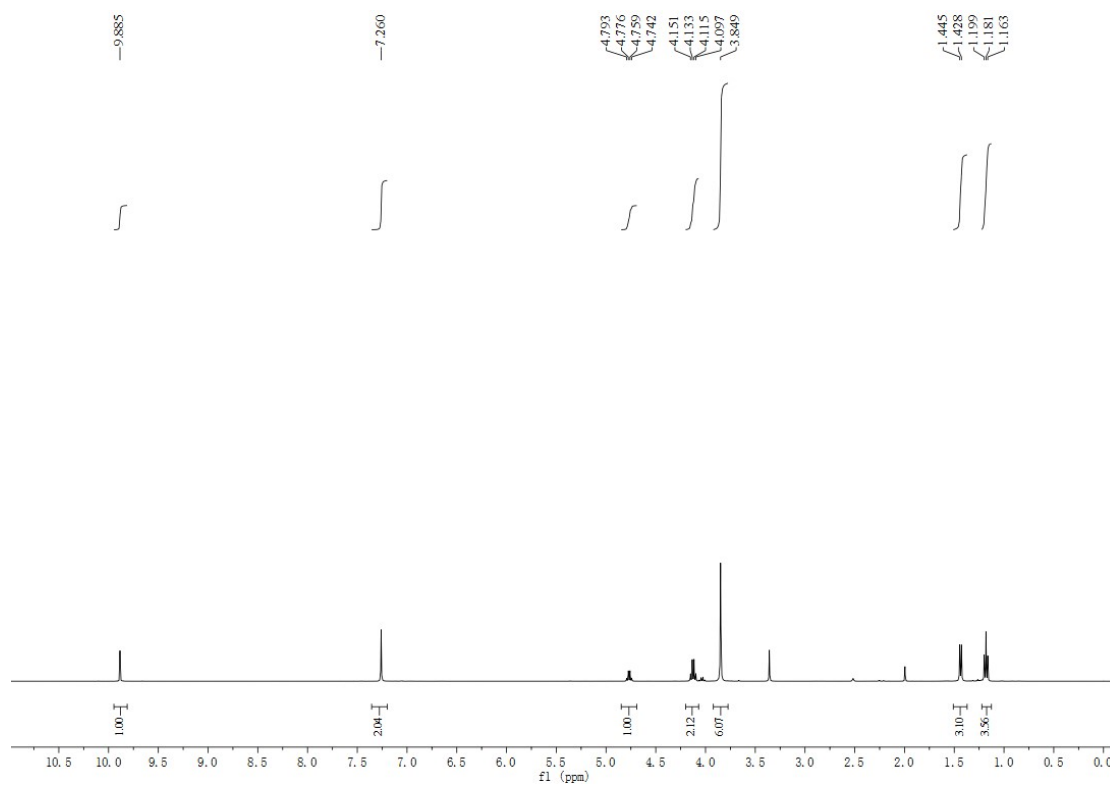

### <sup>1</sup>H-NMR Spectra of compound T1

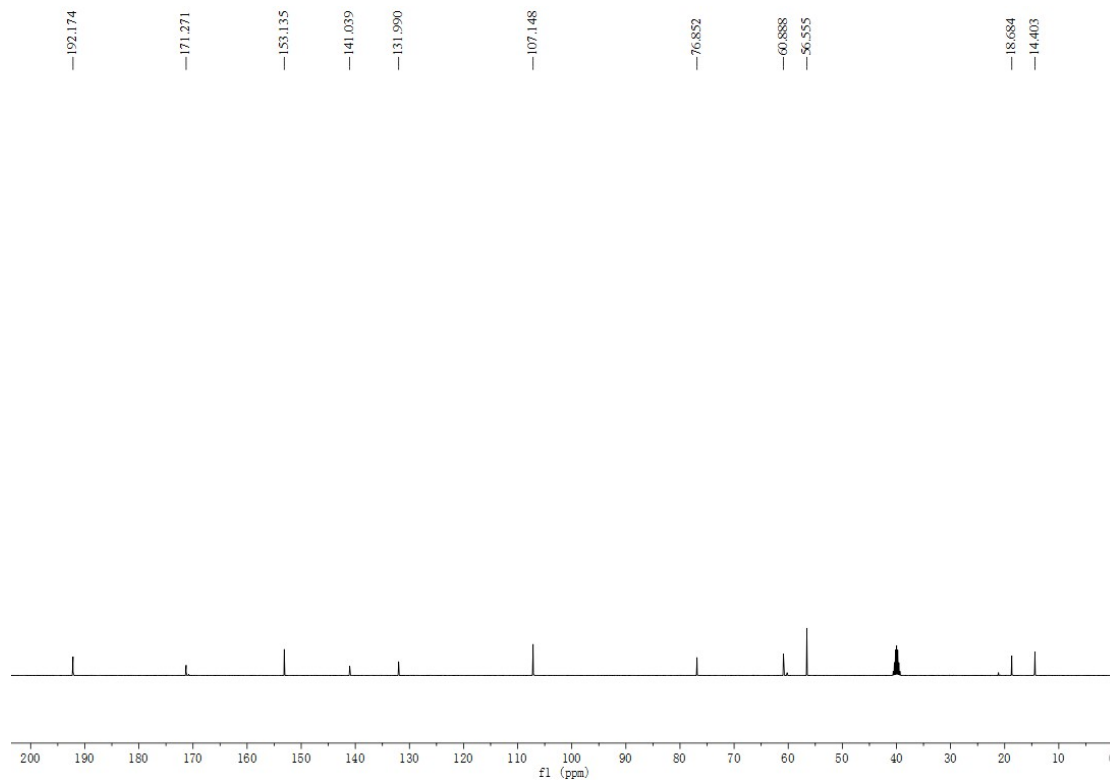

### $^{13}\text{C}$ -NMR Spectra of compound T1

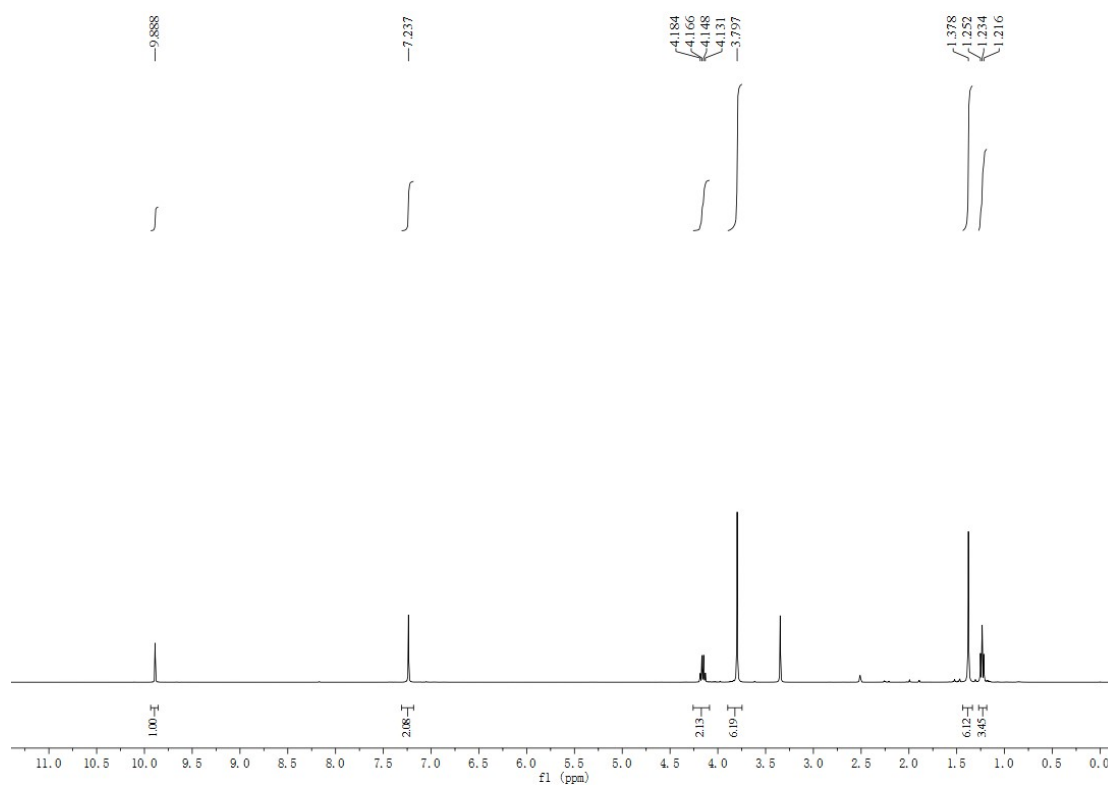

### $^1\text{H}$ -NMR Spectra of compound T2

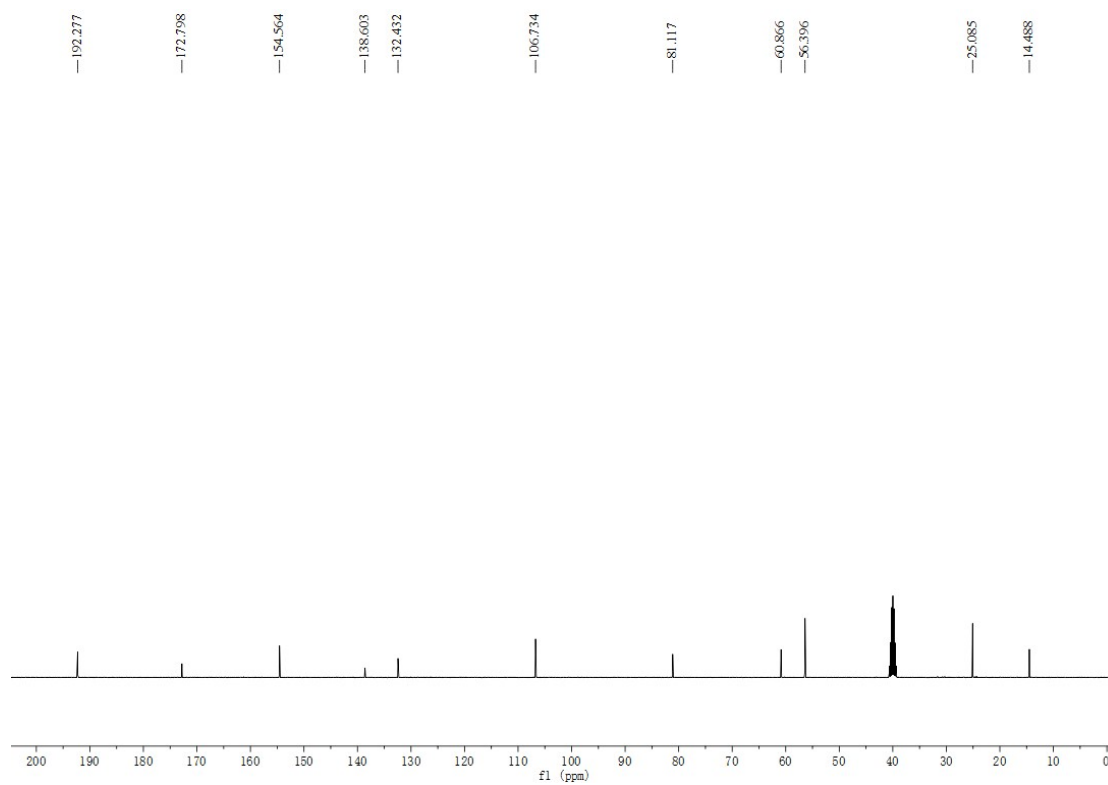

## $^{13}\text{C}$ -NMR Spectra of compound T2

4 #9-34 RT: 0.08-0.32 AV: 26 NL: 8.77E8  
T: FTMS + p ESI Full ms [50.0000-750.0000]

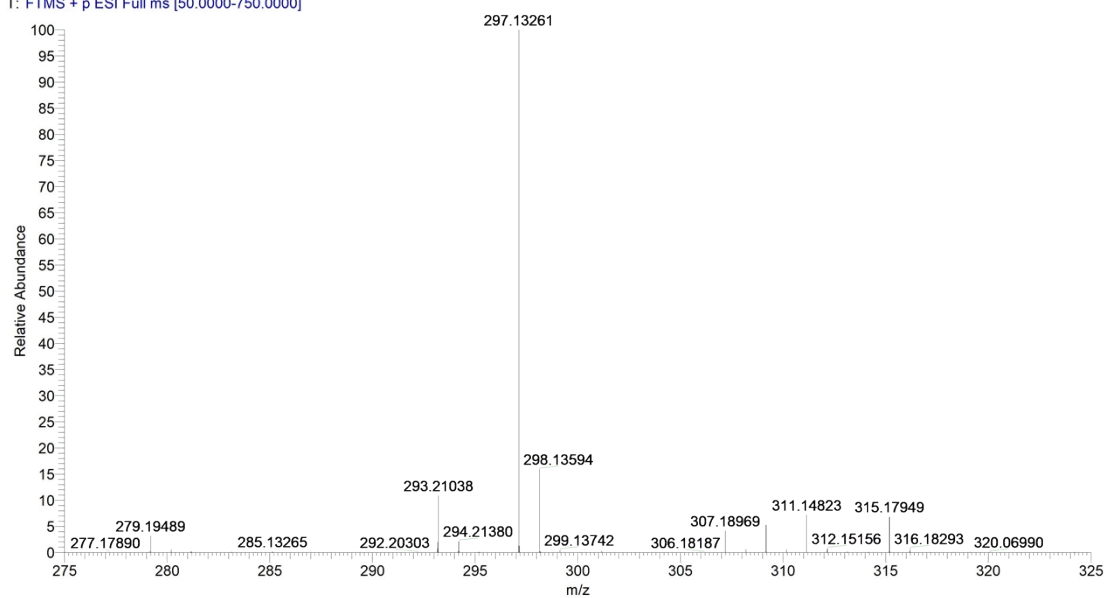

## HR-MS of compound T2

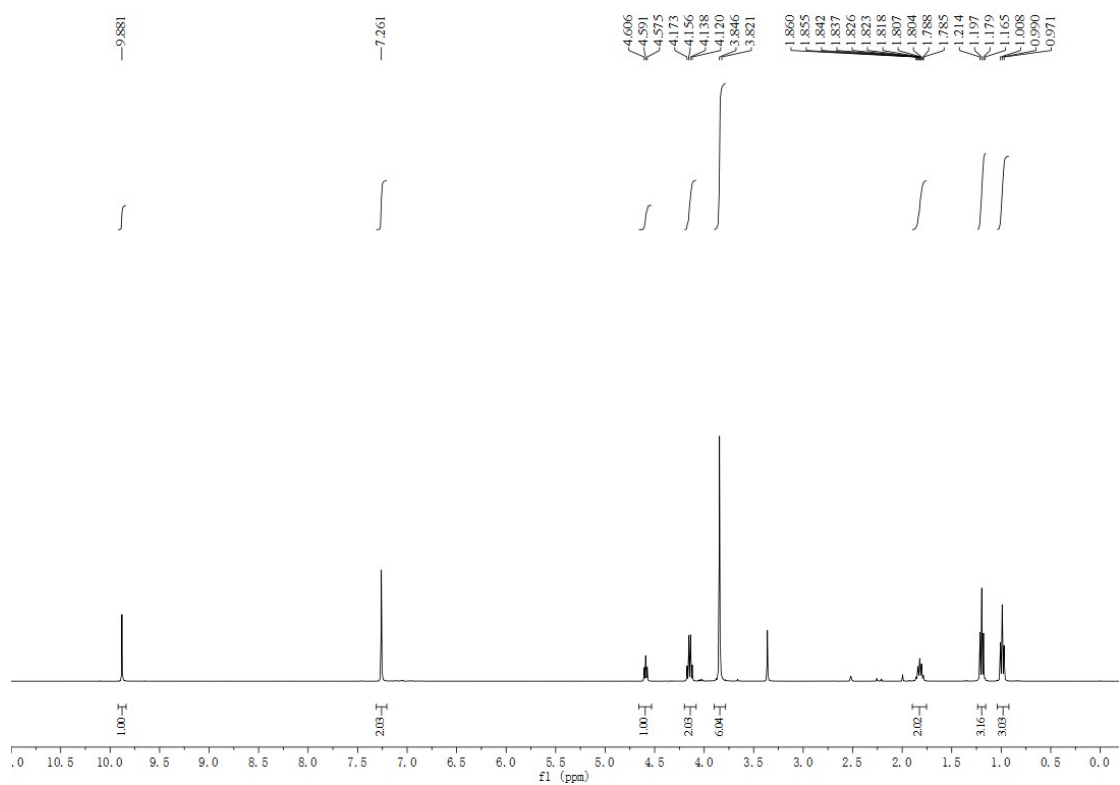

<sup>1</sup>H-NMR Spectra of compound T3

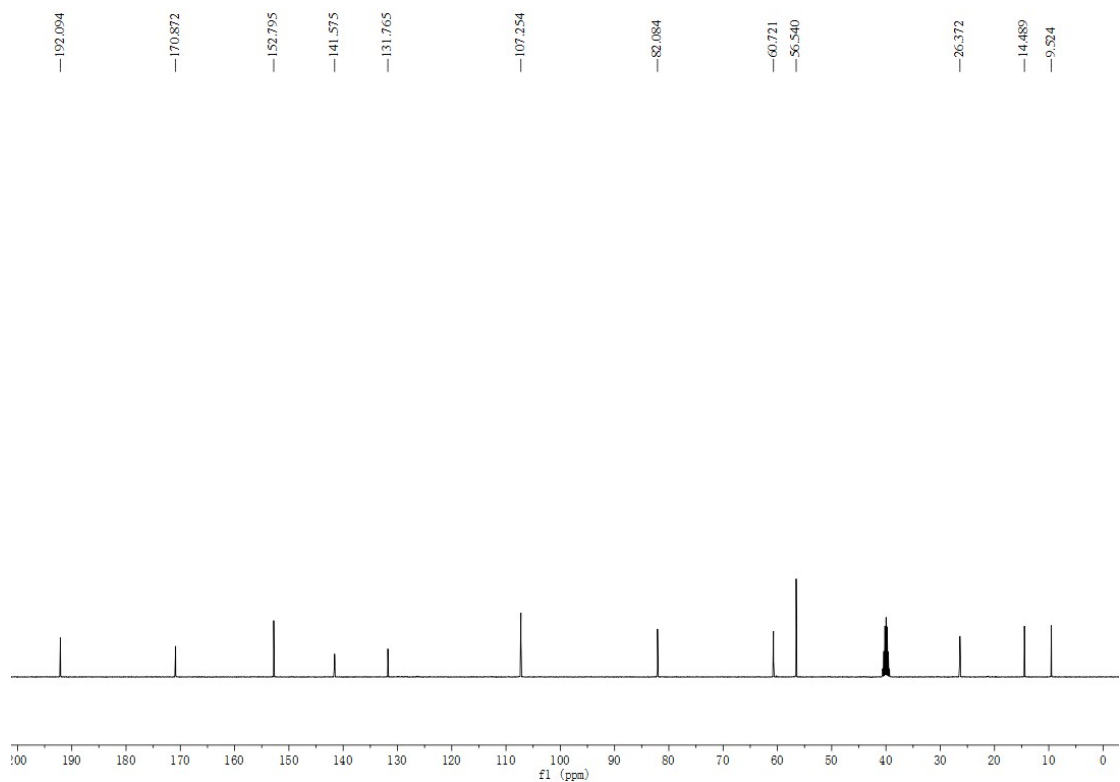

<sup>13</sup>C-NMR Spectra of compound T3

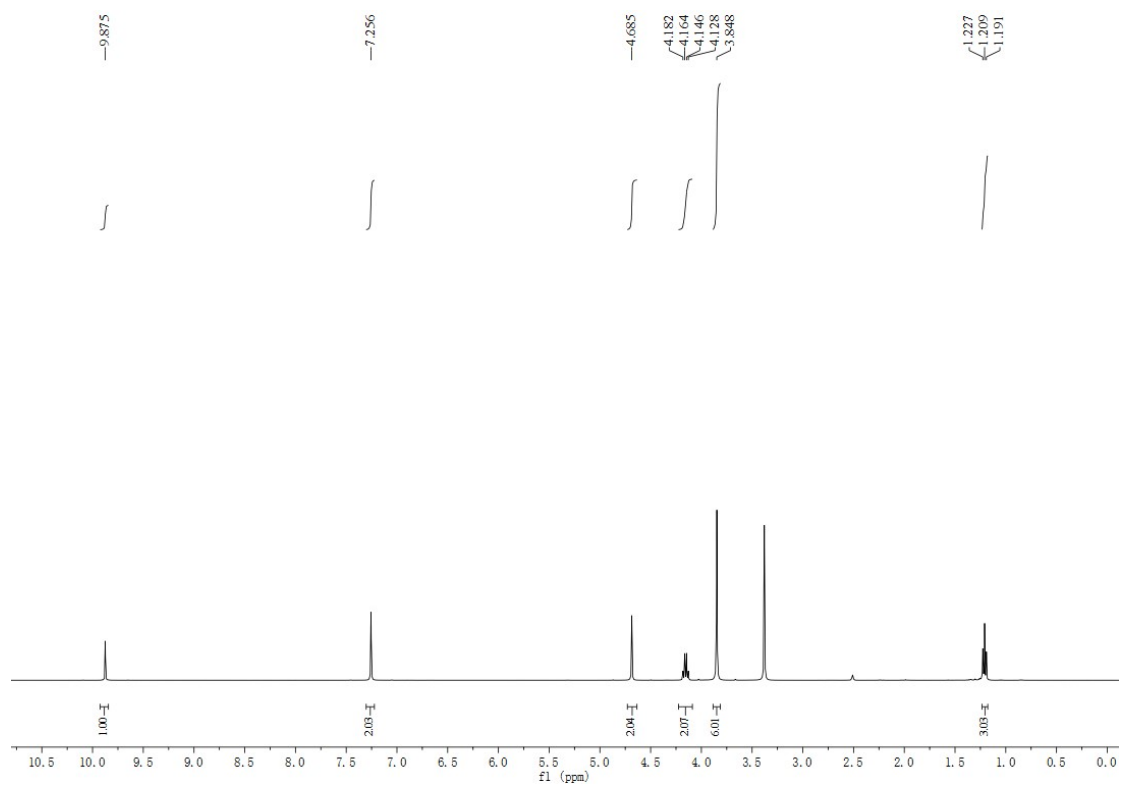

<sup>1</sup>H-NMR Spectra of compound T4

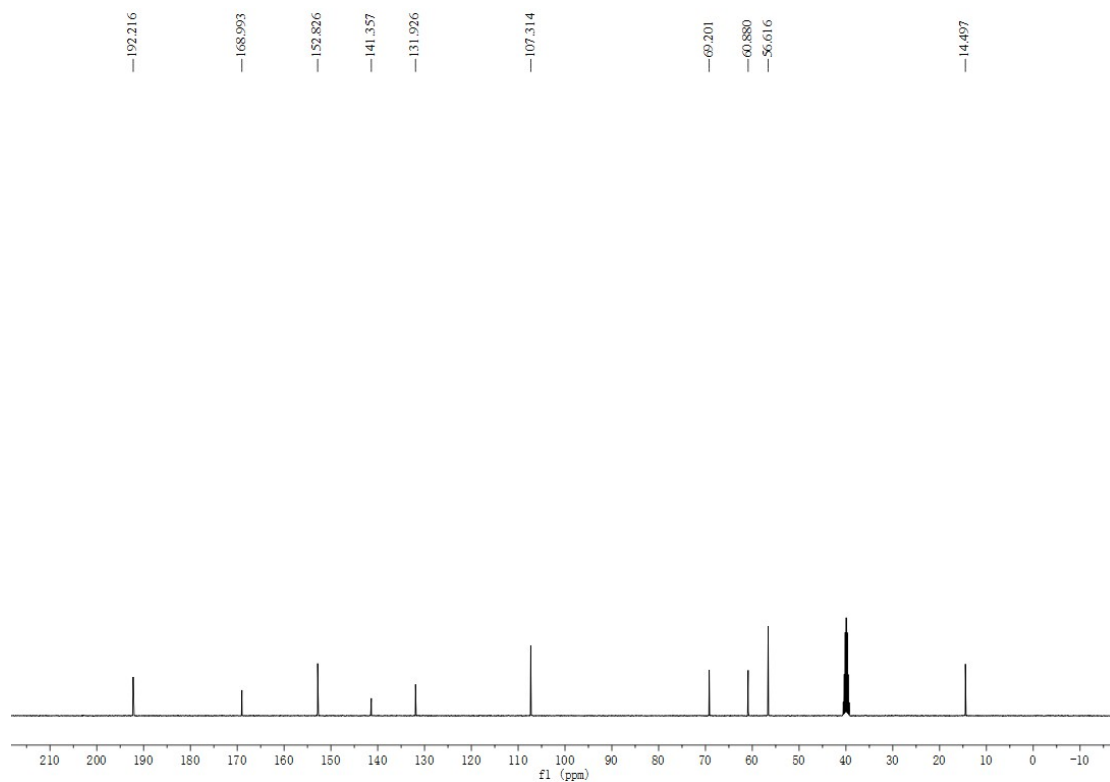

<sup>13</sup>C-NMR Spectra of compound T4

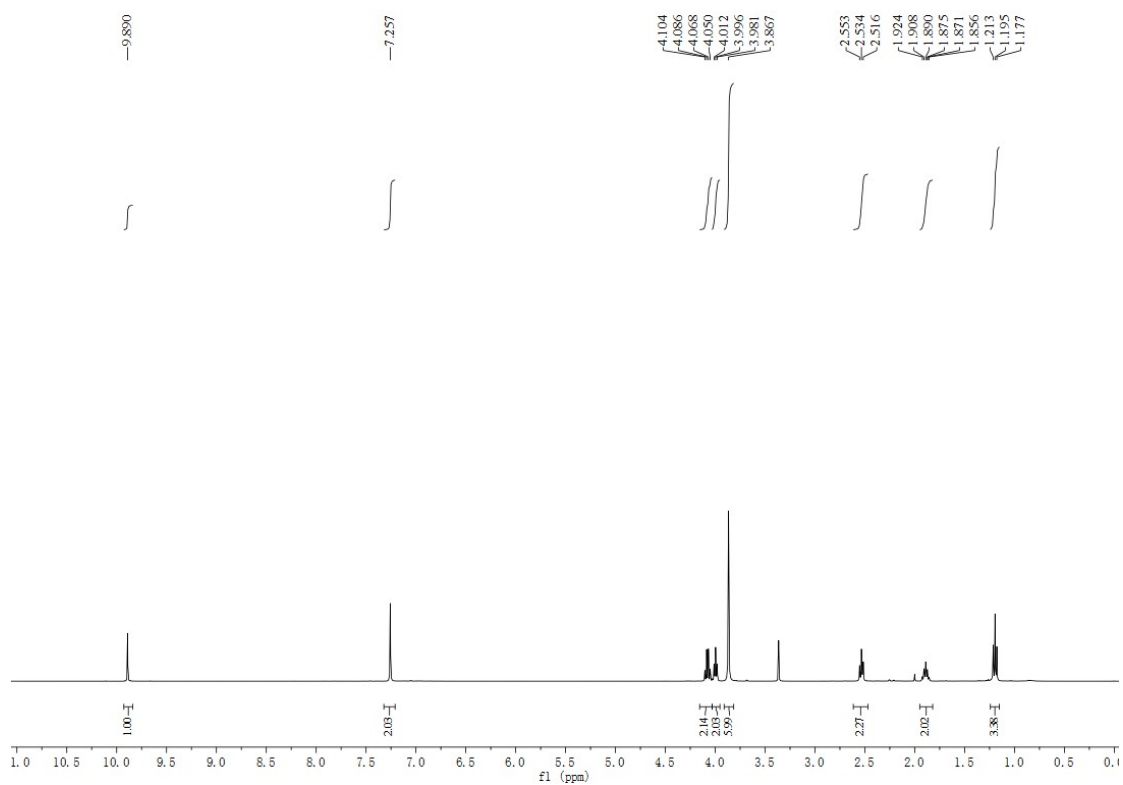

**<sup>1</sup>H-NMR Spectra of compound T5**

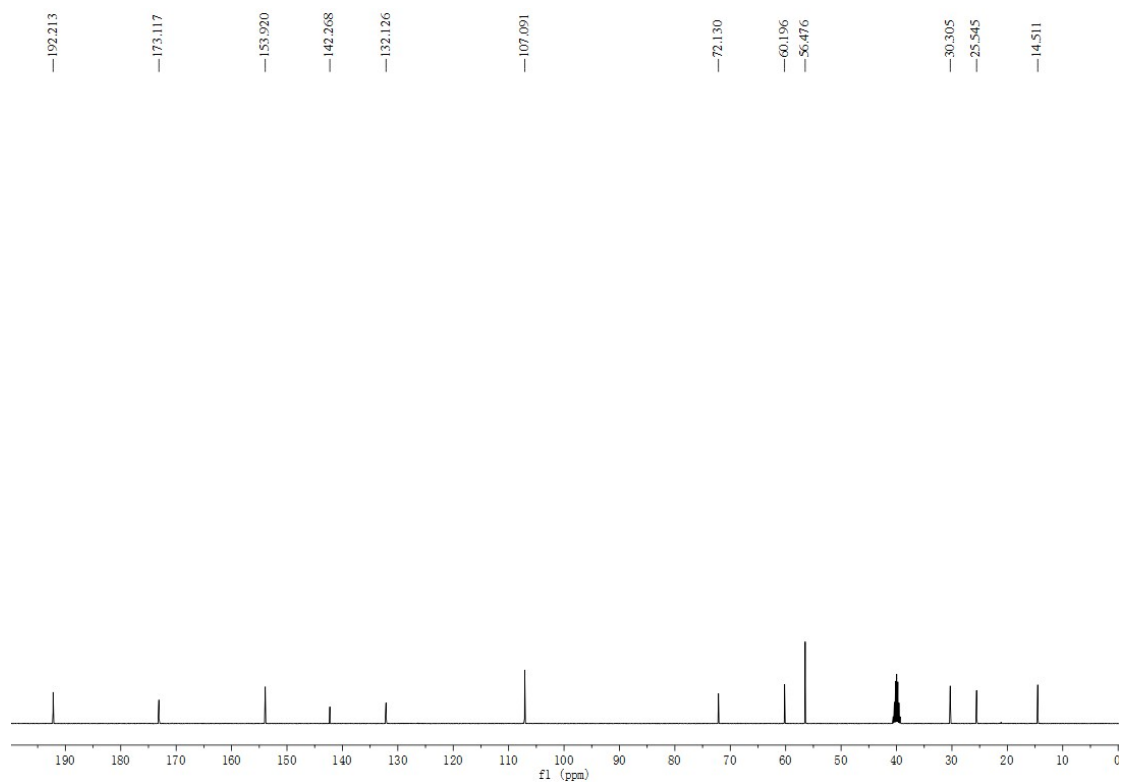

**<sup>13</sup>C-NMR Spectra of compound T5**

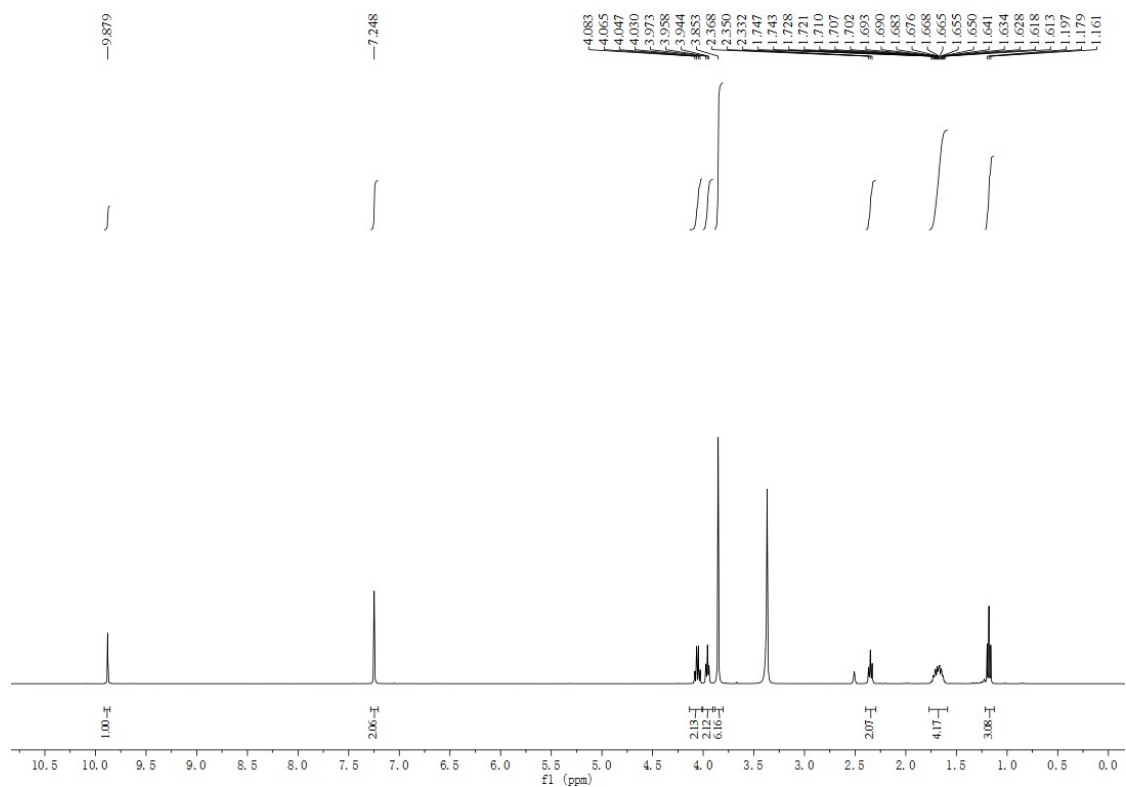

**<sup>1</sup>H-NMR Spectra of compound T6**

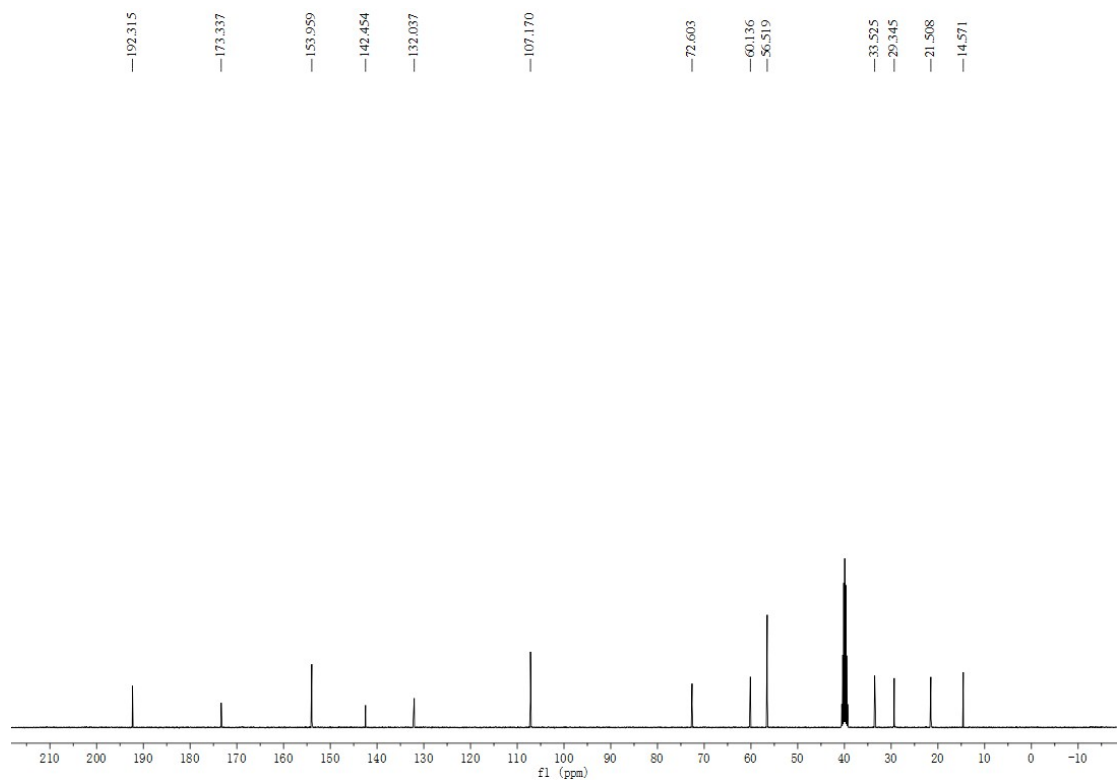

**<sup>13</sup>C-NMR Spectra of compound T6**

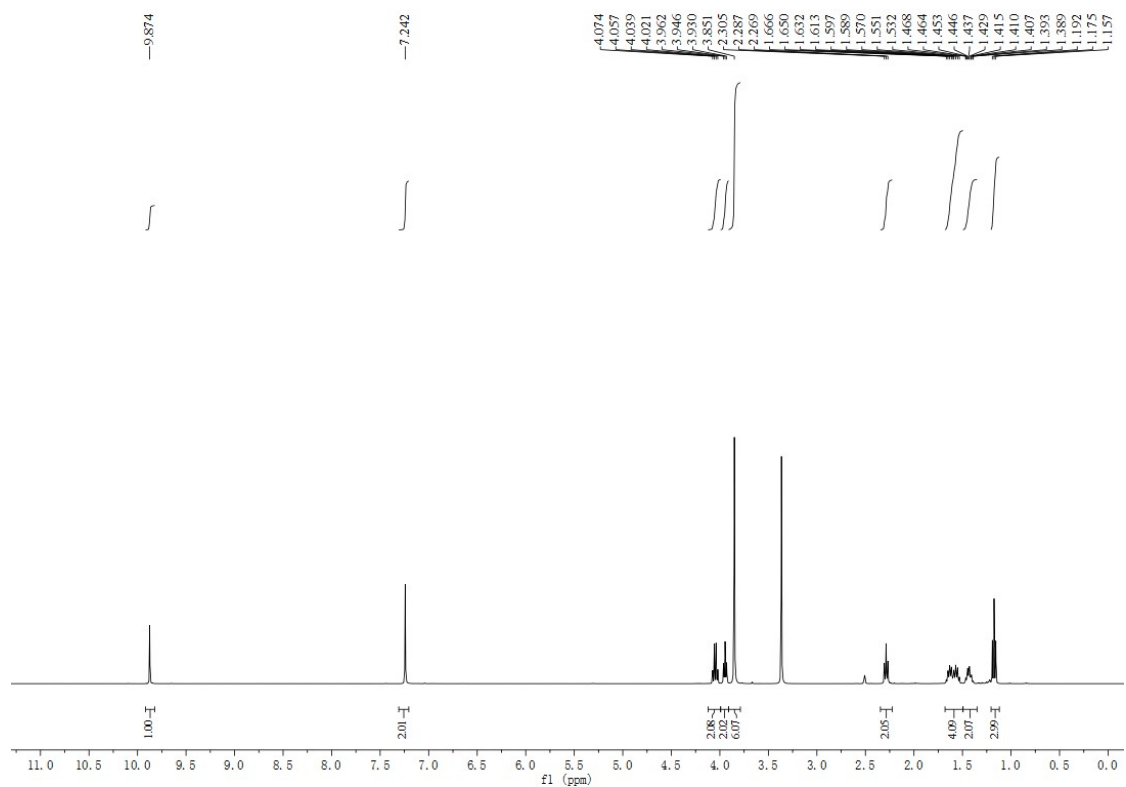

**$^1\text{H}$ -NMR Spectra of compound T7**

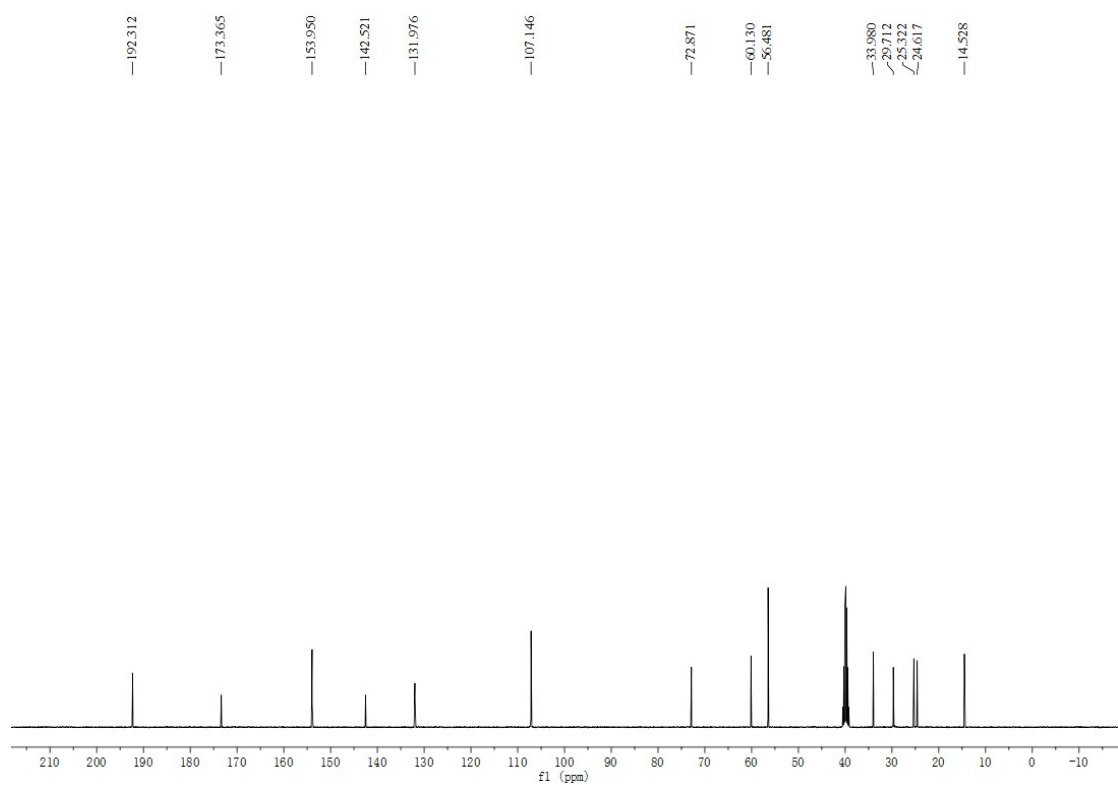

**$^{13}\text{C}$ -NMR Spectra of compound T7**
